# Supplementary material
Source: PubMed Central journal article supplement (PMC6083591)
Supplement: MMI-107-180-s001.pdf [file MMI-107-180-s001.pdf]

## FzIA, an essential regulator of FtsZ filament curvature, controls constriction rate during *Caulobacter* division

Lariviere *et al.*

### Supporting information

#### Supplemental Discussion

##### *Attempts to co-crystallize FtsZ and FzIA were unsuccessful*

We attempted to co-crystallize FtsZ and FzIA at the MRC-LMB crystallization facility. His<sub>6</sub>-FzIA was mixed with either full length FtsZ or FtsZ $\Delta$ CTL. We expected that full length FtsZ might not crystallize readily due to flexibility of the linker domain and we had found that FzIA interacts with FtsZ $\Delta$ CTL. Protein mixtures were made containing either a 1:1 ratio of FtsZ:FzIA or an excess of either FtsZ or FzIA, then incubated at room temperature or 4°C to allow for crystal growth. The only crystals that could be found were FzIA alone. For these experiments, His<sub>6</sub>-FzIA and FtsZ/FtsZ $\Delta$ CTL were purified individually, as described in the methods section.

##### *The P<sub>van</sub> promoter is leaky*

We were curious if any mutant FzIA screening strains could grow in the absence of either inducer. We found when we grew cells in the absence of xylose or vanillate that numerous mutant strains had cells that became elongated and had reduced viability (*fzIA*<sup>WB1</sup>, *fzIA*<sup>UE1</sup>-*fzIA*<sup>UE2</sup>, *fzIA*<sup>NB1</sup>-*fzIA*<sup>NB2</sup>, *fzIA*<sup>NH1</sup>, *fzIA*<sup>W9</sup>, *fzIA*<sup>ST1</sup>-*fzIA*<sup>ST7</sup>, *fzIA*<sup>SOL1</sup>-*fzIA*<sup>SOL6</sup>), as expected (**Figure S3**). Surprisingly, however, WT cells and many of the mutant strain cells exhibited WT cell length and were viable (*fzIA*<sup>UN1</sup>, *fzIA*<sup>NH2</sup>-*fzIA*<sup>NH3</sup>, *fzIA*<sup>W1</sup>-*fzIA*<sup>W8</sup>, and *fzIA*<sup>W10</sup>) (**Figure S3**).  $\alpha$ -FzIA immunoblotting of the mutants that were subsequently characterized biochemically revealed that in the absence of inducers, low levels of the mCherry-FzIA variants and WT FzIA were present (**Figure S9**). This suggests that the P<sub>van</sub>, and to a lesser extent P<sub>xyI</sub>, promoters were leaky (**Figure S4B**). The low expression levels of the functional or partially functional mutant FzIA variants were apparently sufficient to enable growth.

##### *Untagged FzIA forms helices with FtsZ at pH 6.5*

His<sub>6</sub>-FzIA was previously shown to bind, form helices with, and lower the GTPase rate of FtsZ using HEK polymerization buffer (50 mM HEPES-KOH [pH7.2], 50 mM KCl, 0.1 mM EDTA) with 2.5 mM MgCl<sub>2</sub> and 2 mM GTP. For our study, we sought to characterize the activity of untagged FzIA mutant proteins, in order to control against any potential His<sub>6</sub> artifacts. We purified His<sub>6</sub>-SUMO-WT FzIA, then cleaved the affinity tag. Interestingly, when we conducted the FtsZ interaction assays with untagged FzIA using HEK polymerization buffer and the same conditions as before, although FzIA still bound FtsZ efficiently, we rarely observed FtsZ helix formation or an effect on GTPase rate. After optimizing numerous variables, we found that untagged FzIA promotes formation of FtsZ helices efficiently at pH 6.5, but not pH 7.2 (data not shown). This may reflect the difference in the predicted pI of the two forms of FzIA: His<sub>6</sub>-FzIA is predicted to have a pI of 7.4 and untagged FzIA is predicted to have a pI of 6.8. Untagged FzIA would therefore be above its pI at pH 7.2 whereas the His<sub>6</sub>-tagged version would be below its pI. Lowering the pH to 6.5 would be predicted to place both proteins below their pI and

render each a net positive charge. Since FtsZ still efficiently polymerizes and hydrolyzes GTP at this lower pH, we carried out all FzlA-FtsZ interaction assays using these conditions.

Although the pH and salt concentration of the *E. coli* cytoplasm has been reported to be close to neutral and 250 mM potassium, respectively, there is no information on the conditions of the *C. crescentus* cytoplasm. Given the distinct environmental niches occupied by *E. coli* and *C. crescentus* it may not be fair to assume equivalent pH and salt concentrations in *C. crescentus*. Therefore, it is difficult to know what the appropriate “physiological” conditions might be to inform conditions for our *in vitro* assays. In order to maximize our ability to distinguish possible differences between our mutant FzlA proteins and WT, we used pH 6.5, 50 mM KCl buffer for all of our *in vitro* assays. We acknowledge that it is impossible to fully recapitulate the chemical and physical conditions of the cell – even when these are known - in a test tube, so all activities observed *in vitro* must be viewed with the caveat that they may not occur in the context of the cell.

**Table S1. Additional FzIA mutant phenotypes and activity**

| Mutant Class                          | Name                 | Residue Mutations       | <i>P<sub>van</sub> mChy-mutant fzIA, P<sub>xyl</sub> fzIA</i> |                       |                   |
|---------------------------------------|----------------------|-------------------------|---------------------------------------------------------------|-----------------------|-------------------|
|                                       |                      |                         | Doubling Time (min)                                           | Max OD <sub>600</sub> | FzIA Localization |
| Poor <u>S</u> tability                | FzIA <sup>ST1</sup>  | E25K                    | -                                                             | -                     | No signal         |
|                                       | FzIA <sup>ST2</sup>  | R94D E96K R98D          | -                                                             | -                     | Diffuse           |
|                                       | FzIA <sup>ST3</sup>  | E151K K188D D189R       | -                                                             | -                     | No signal         |
|                                       | FzIA <sup>ST4</sup>  | W159A W196A K199D       | -                                                             | -                     | Diffuse           |
|                                       | FzIA <sup>ST5</sup>  | G183W V185A             | 122.9 ± 2.9                                                   | 1.85 ± 0.0327         | Diffuse           |
|                                       | FzIA <sup>ST6</sup>  | W187A K194E             | -                                                             | -                     | Diffuse           |
|                                       | FzIA <sup>ST7</sup>  | K201D S202A R203D P204A | -                                                             | -                     | Diffuse           |
| Poor <u>S</u> olubility               | FzIA <sup>SOL1</sup> | R20D                    | -                                                             | -                     | Diffuse           |
|                                       | FzIA <sup>SOL2</sup> | R99D W103A D105K        | -                                                             | -                     | Diffuse           |
|                                       | FzIA <sup>SOL3</sup> | D109R R127D             | 133.0 ± 0.7                                                   | 2.24 ± 0.0355         | Diffuse           |
|                                       | FzIA <sup>SOL4</sup> | E111K H146D             | 150.9 ± 4.2                                                   | 0.85 ± 0.0425         | Diffuse           |
|                                       | FzIA <sup>SOL5</sup> | W187A                   | -                                                             | -                     | Diffuse           |
|                                       | FzIA <sup>SOL6</sup> | R207D L210A             | 144.6 ± 0.6                                                   | 1.63 ± 0.0225         | Midcell           |
| <u>WT</u> -like                       | FzIA <sup>W1</sup>   | P14A                    | -                                                             | -                     | Midcell           |
|                                       | FzIA <sup>W2</sup>   | R27D E81K E83K          | -                                                             | -                     | Midcell           |
|                                       | FzIA <sup>W3</sup>   | K60D H61D R63D          | -                                                             | -                     | Midcell           |
|                                       | FzIA <sup>W4</sup>   | R89D D90R               | -                                                             | -                     | Midcell           |
|                                       | FzIA <sup>W5</sup>   | K120D D184R             | -                                                             | -                     | Midcell           |
|                                       | FzIA <sup>W6</sup>   | D132R                   | -                                                             | -                     | Midcell           |
|                                       | FzIA <sup>W7</sup>   | L153A R157D             | -                                                             | -                     | Midcell           |
|                                       | FzIA <sup>W8</sup>   | D158R R163D R164D       | -                                                             | -                     | Midcell           |
|                                       | FzIA <sup>W9</sup>   | D212R R213D             | -                                                             | -                     | Midcell           |
|                                       | FzIA <sup>W10</sup>  | P219A H222D             | -                                                             | -                     | Midcell           |
|                                       | FzIA <sup>W11</sup>  | F228A                   | -                                                             | -                     | Midcell           |
| <u>Unknown Non-essential</u> activity | FzIA <sup>UN2</sup>  | Y223A                   | -                                                             | -                     | Midcell           |

Values shown as mean ± SEM. For co-pelleting data, values are reported as fold change of % FzIA in pellet alone vs. with FtsZ.

**Table S2. Plasmid List (see excel file)**

**Table S3. Strain List (see excel file)**

**Supplemental Figures**

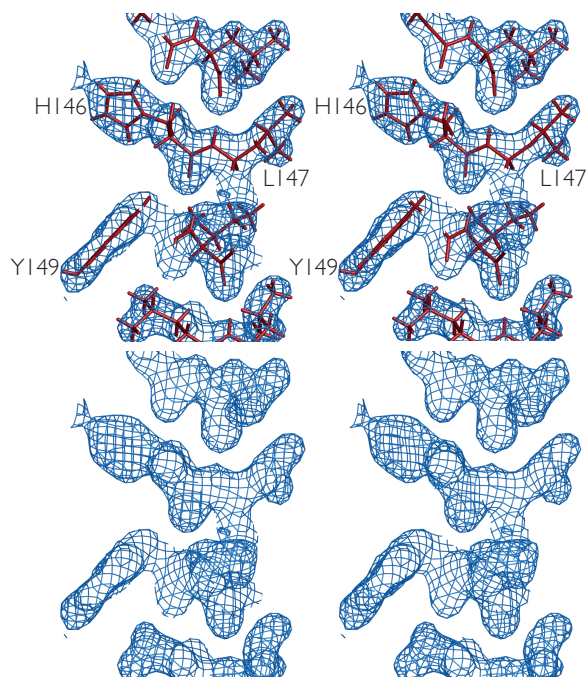

**Fig. S1. Close-up of a stereo image of the electron density map of FzIA**

Shown are wall-eyed stereo images of the 2Fo-Fc map contoured at the sigma level 1.0. Views of the map with and without fitted atomic model are presented next to each other displaying H146, L147 and Y149.

A

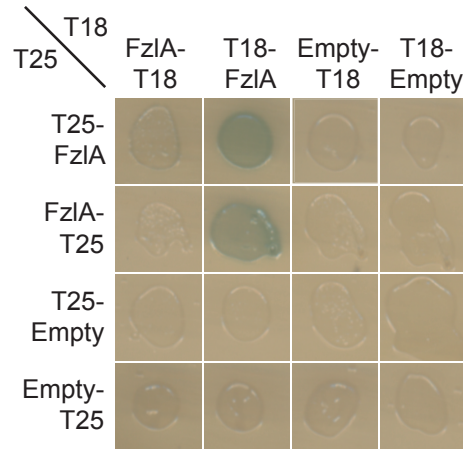

B

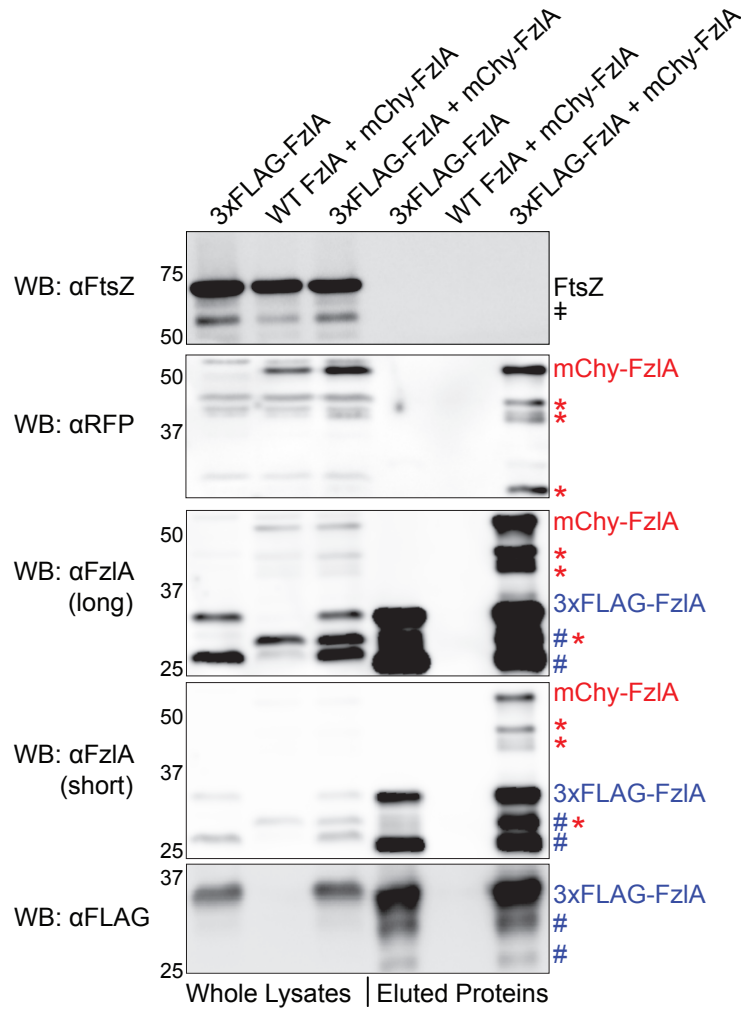

**Fig. S2. FzIA self-interacts *in vivo***

A. Cultures of *E. coli* BTH101 strains producing the indicated FzIA fusions or carrying empty vector controls spotted on plates containing IPTG and X-Gal. T18-FzIA interacts with both N- and C-terminal T25 FzIA fusions. B. mCherry-FzIA co-immunoprecipitates with 3xFLAG-FzIA

from *C. crescentus* cell lysates. Western blot analysis of whole cell lysates of strains producing the indicated FzlA variants (left) and eluates from samples of the same strains obtained by immunoprecipitation with  $\alpha$ -FLAG resin and elution with FLAG peptide (right). Cultures were grown to log phase and induced for 1hr with vanillate before preparation of lysates and immunoprecipitation. Antibodies used for western blotting (WB) are indicated to the left of the blots. Long=longer exposure. Short = shorter exposure. ‡ = FtsZ degradation product. Red = mCherry-FzlA derived species. \* = mCherry-FzlA degradation products. Blue = 3xFLAG-FzlA derived species. # = 3xFLAG-FzlA degradation products. mChy = mCherry. Strain key: 3xFLAG-FzlA (EG2217), WT FzlA + mChy-FzlA (EG2451), 3xFLAG-FzlA+ mChy-FzlA (EG2452).

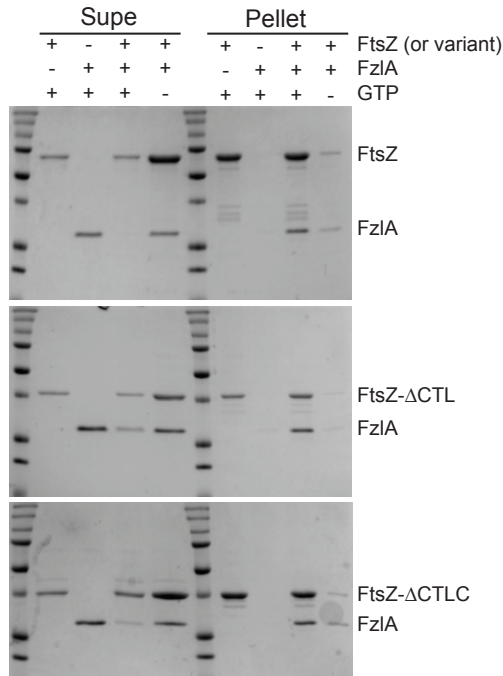

**Fig. S3. FzlA Interacts with the GTPase domain of FtsZ**

Coomassie-stained SDS-PAGE gels of supernatant and pellet fractions from high-speed co-sedimentation assays of 3  $\mu$ M His<sub>6</sub>-FzlA + 3  $\mu$ M FtsZ (top), 3  $\mu$ M FtsZ $\Delta$ CTL (middle), and 3  $\mu$ M FtsZ $\Delta$ CTLC (bottom). Both His<sub>6</sub>-FzlA and each FtsZ variant are preferentially recruited to the pellet in the presence of GTP. Reactions were performed in HEK50 polymerization buffer (50 mM HEPES-KOH [pH 7.2], 50 mM KCl, 0.1 mM EDTA) with 2 mM GTP, 2.5 mM MgCl<sub>2</sub>, and 0.05% Triton X-100.

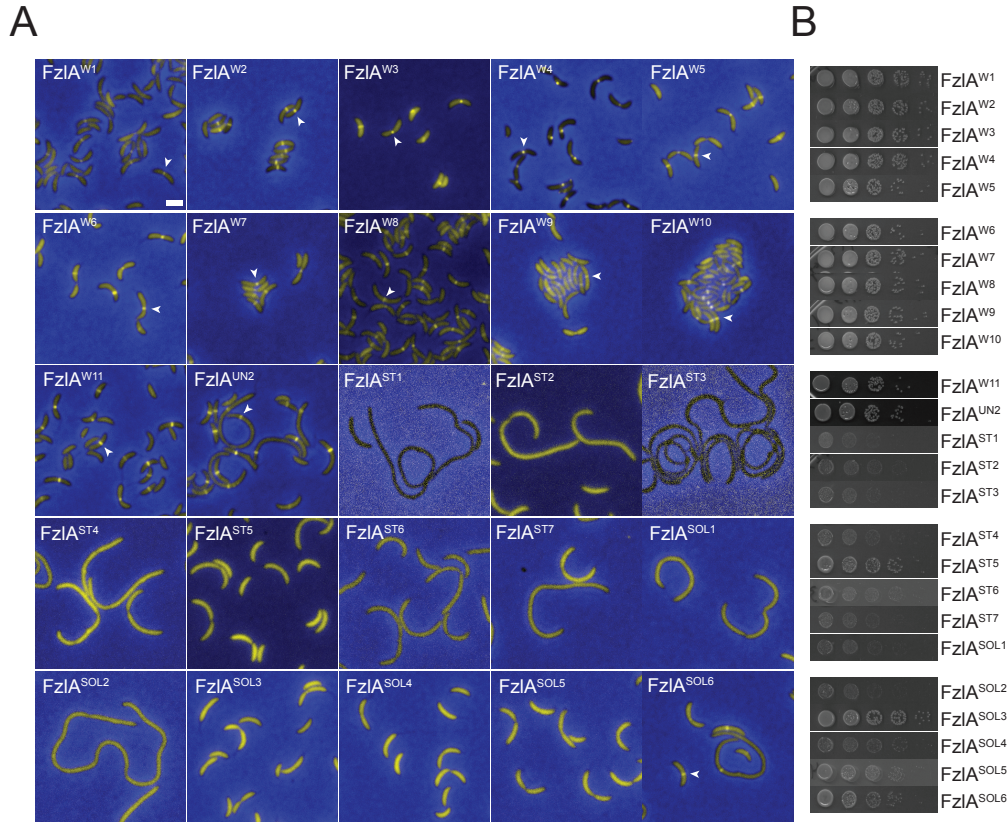

**Fig. S4. Many *fzIA* mutant strains displayed wild-type phenotypes or were unstable or insoluble.**

A. Merged fluorescence microscopy images depicting mCherry-FzIA mutant protein (yellow) localization in cells in  $\Delta fzIA$   $P_{xyl}\text{-}fzIA$   $P_{van}\text{-}mCherry\text{-}fzIA$  mutant backgrounds (labels indicate mutant alleles fused to mCherry, with expression driven by  $P_{van}$ ). Cells were depleted of WT FzIA and grown with vanillate for 24 hours prior to imaging. White arrowheads mark localized FzIA bands. Scale bar = 2  $\mu\text{m}$ . B. Spot dilutions of  $\Delta fzIA$   $P_{xyl}\text{-}fzIA$ ,  $P_{van}\text{-}mCherry\text{-}fzIA$  mutant strains, plated on PYE-agar with vanillate. Strain key: FzIA<sup>W1</sup> (EG1426), FzIA<sup>W2</sup> (EG1428), FzIA<sup>W3</sup> (EG1431), FzIA<sup>W4</sup> (EG1432), FzIA<sup>W5</sup> (EG1439), FzIA<sup>W6</sup> (EG1440), FzIA<sup>W7</sup> (EG1443), FzIA<sup>W8</sup> (EG1444), FzIA<sup>W9</sup> (EG1455), FzIA<sup>W10</sup> (EG1456), FzIA<sup>W11</sup> (EG2304), FzIA<sup>UN2</sup> (EG2302), FzIA<sup>ST1</sup> (EG1429), FzIA<sup>ST2</sup> (EG1433), FzIA<sup>ST3</sup> (EG1454), FzIA<sup>ST4</sup> (EG1450), FzIA<sup>ST5</sup> (EG1451), FzIA<sup>ST6</sup> (EG1314), FzIA<sup>ST7</sup> (EG1452), FzIA<sup>SOL1</sup> (EG1427), FzIA<sup>SOL2</sup> (EG1434), FzIA<sup>SOL3</sup> (EG1436), FzIA<sup>SOL4</sup> (EG1437), FzIA<sup>SOL5</sup> (EG1315), FzIA<sup>SOL6</sup> (EG1453).



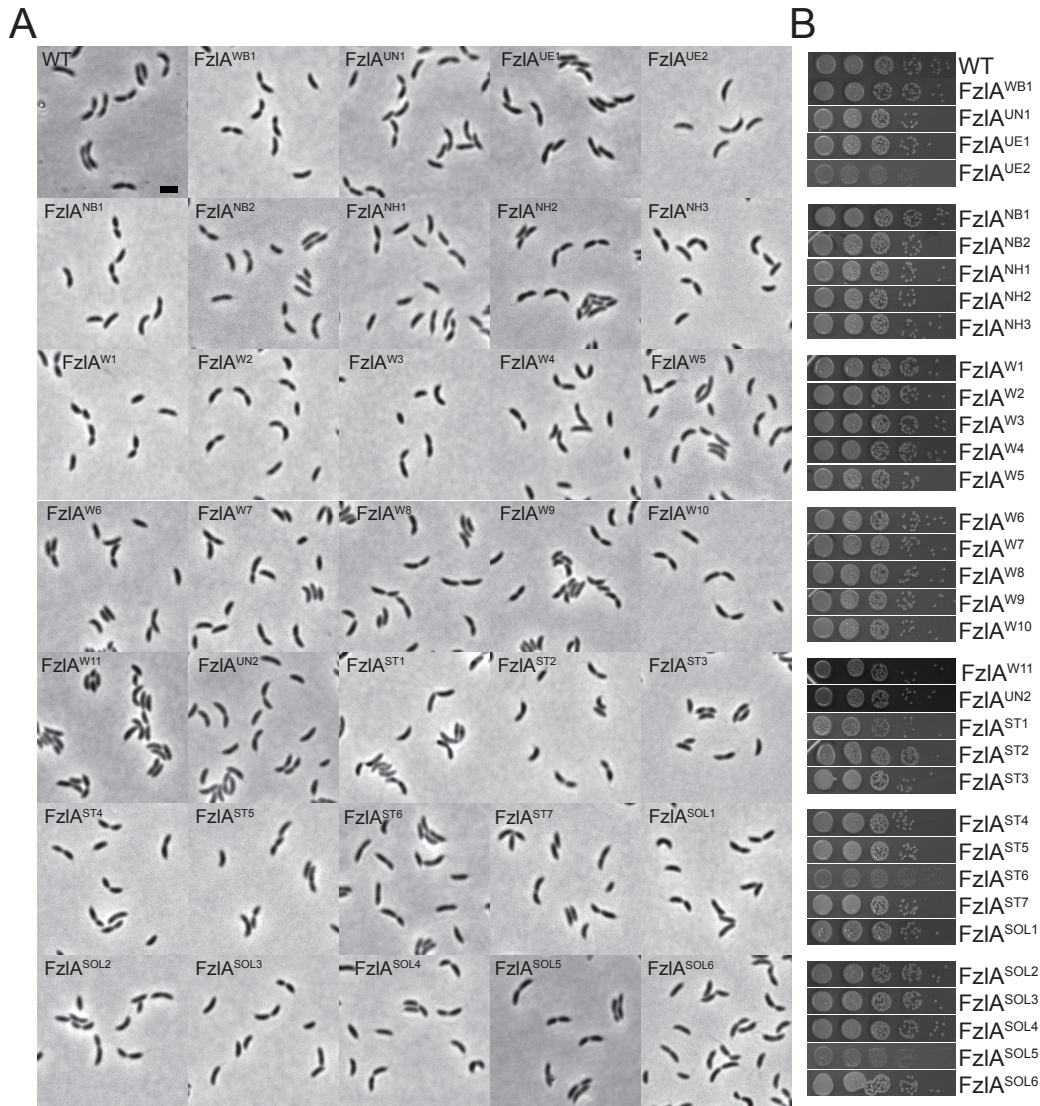

**Fig. S5. *fzIA* mutant strains grown with xylose to induce WT FzIA grow normally.**

A. Phase contrast images depicting mutant cells with  $\Delta fzIA$   $P_{xyt}$ -*fzIA*  $P_{van}$ -*mCherry-fzIA* mutant backgrounds. Cells were grown with xylose. Scale bar = 2  $\mu$ m. B. Spot dilutions of  $\Delta fzIA$   $P_{xyt}$ -*fzIA*  $P_{van}$ -*mCherry-fzIA* mutant strains, plated on PYE-agar with xylose. Strain key: WT (NA1000), FzIA<sup>WB1</sup> (EG1435), FzIA<sup>UN1</sup> (EG1312), FzIA<sup>UE1</sup> (EG1313), FzIA<sup>UE2</sup> (EG1621), FzIA<sup>NB1</sup> (EG1430), FzIA<sup>NB2</sup> (EG1438), FzIA<sup>NH1</sup> (EG1311), FzIA<sup>NH2</sup> (EG1441), FzIA<sup>NH3</sup> (EG1442), FzIA<sup>W1</sup> (EG1426), FzIA<sup>W2</sup> (EG1428), FzIA<sup>W3</sup> (EG1431), FzIA<sup>W4</sup> (EG1432), FzIA<sup>W5</sup> (EG1439), FzIA<sup>W6</sup> (EG1440), FzIA<sup>W7</sup> (EG1443), FzIA<sup>W8</sup> (EG1444), FzIA<sup>W9</sup> (EG1455), FzIA<sup>W10</sup> (EG1456), FzIA<sup>W11</sup> (EG2304), FzIA<sup>UN2</sup> (EG2302), FzIA<sup>ST1</sup> (EG1429), FzIA<sup>ST2</sup> (EG1433), FzIA<sup>ST3</sup> (EG1454), FzIA<sup>ST4</sup> (EG1450), FzIA<sup>ST5</sup> (EG1451), FzIA<sup>ST6</sup> (EG1314), FzIA<sup>ST7</sup> (EG1452), FzIA<sup>SOL1</sup> (EG1427), FzIA<sup>SOL2</sup> (EG1434), FzIA<sup>SOL3</sup> (EG1436), FzIA<sup>SOL4</sup> (EG1437), FzIA<sup>SOL5</sup> (EG1315), FzIA<sup>SOL6</sup> (EG1453).

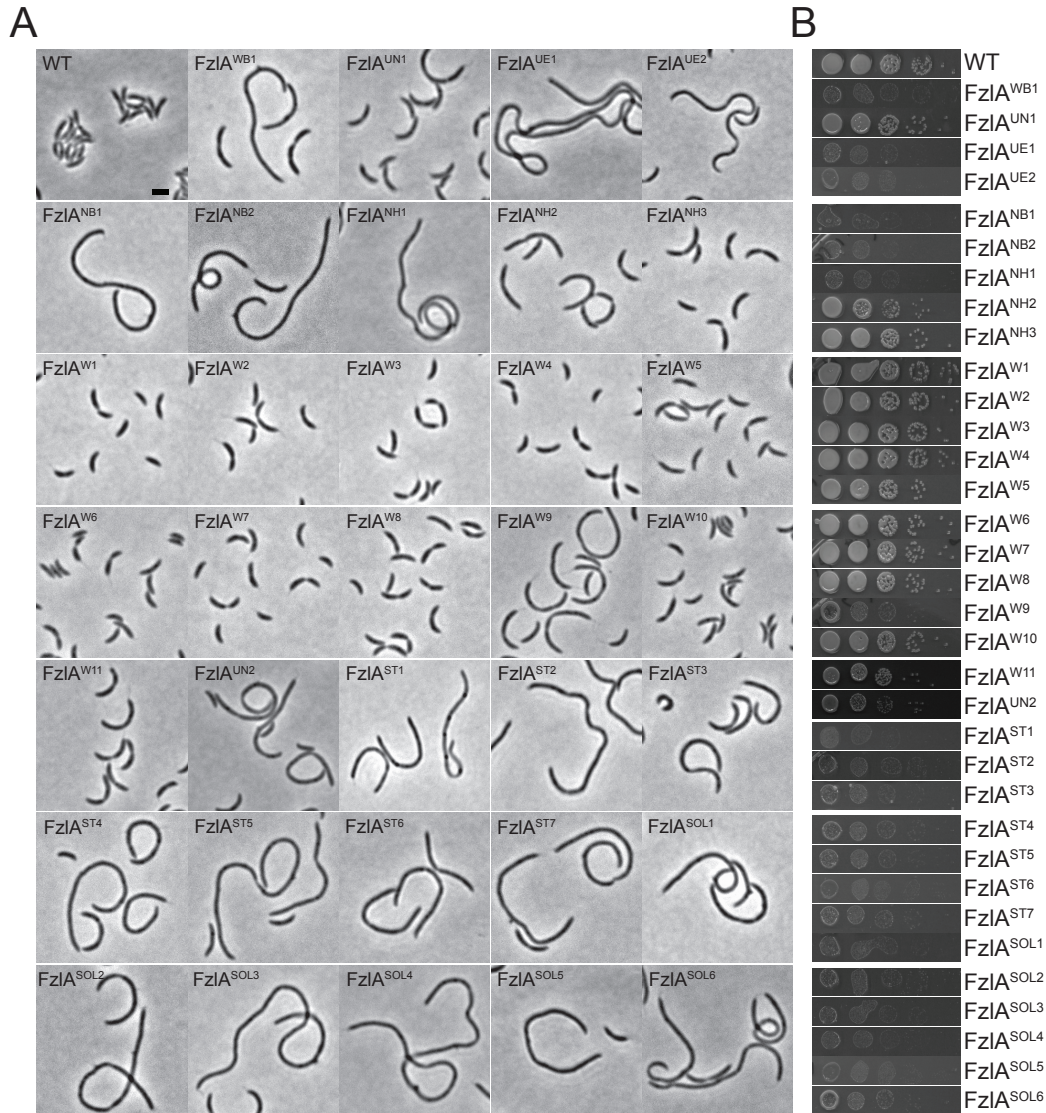

**Fig. S6. *fzIA* mutant strains grown without inducers display a range of growth phenotypes that correlate with their activities in the presence of vanillate.**

A. Phase contrast images depicting mutant cells with  $\Delta fzIA$   $P_{xyl}$ -*fzIA*  $P_{van}$ -*mCherry-fzIA* mutant backgrounds. Cells were grown without inducers and with glucose to repress the  $P_{xyl}$  promoter for 24 hours prior to imaging. (FzIA<sup>ST1</sup> cells displayed severe growth defects and did not reach log phase in 24 hours. These cells were imaged after 48 hours.) Scale bar = 2  $\mu$ m. Note that for WT cells and strains with mutant *fzIA* genes that support division, leaky expression from the  $P_{van}$  promoter is sufficient to support growth. B. Spot dilutions of  $\Delta fzIA$   $P_{xyl}$ -*fzIA*  $P_{van}$ -*mCherry-fzIA* mutant strains, plated on PYE-agar with glucose and without inducers. Strain key: WT (NA1000), FzIA<sup>WB1</sup> (EG1435), FzIA<sup>UN1</sup> (EG1312), FzIA<sup>UE1</sup> (EG1313), FzIA<sup>UE2</sup> (EG1621), FzIA<sup>NB1</sup> (EG1430), FzIA<sup>NB2</sup> (EG1438), FzIA<sup>NH1</sup> (EG1311), FzIA<sup>NH2</sup> (EG1441), FzIA<sup>NH3</sup> (EG1442), FzIA<sup>W1</sup> (EG1426), FzIA<sup>W2</sup> (EG1428), FzIA<sup>W3</sup> (EG1431), FzIA<sup>W4</sup> (EG1432), FzIA<sup>W5</sup> (EG1439), FzIA<sup>W6</sup> (EG1440), FzIA<sup>W7</sup> (EG1443), FzIA<sup>W8</sup> (EG1444), FzIA<sup>W9</sup> (EG1455), FzIA<sup>W10</sup> (EG1456), FzIA<sup>W11</sup> (EG2304), FzIA<sup>UN2</sup> (EG2302), FzIA<sup>ST1</sup> (EG1429), FzIA<sup>ST2</sup> (EG1433), FzIA<sup>ST3</sup> (EG1454), FzIA<sup>ST4</sup> (EG1450), FzIA<sup>ST5</sup> (EG1451), FzIA<sup>ST6</sup> (EG1314), FzIA<sup>ST7</sup>

(EG1452), FzlA<sup>SOL1</sup> (EG1427), FzlA<sup>SOL2</sup> (EG1434), FzlA<sup>SOL3</sup> (EG1436), FzlA<sup>SOL4</sup> (EG1437),  
FzlA<sup>SOL5</sup> (EG1315), FzlA<sup>SOL6</sup> (EG1453).

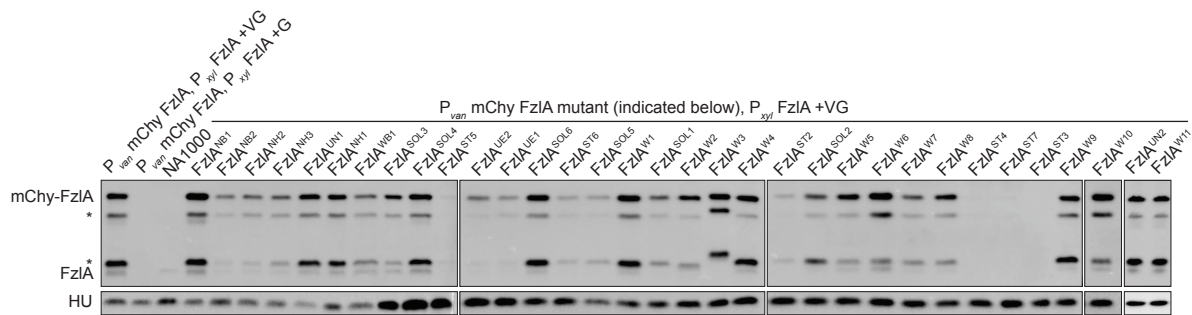

**Fig. S7. Protein levels of mCherry-FzIA under induction conditions.**

$\alpha$ -FzIA (top) and  $\alpha$ -HU (bottom, loading control) immunoblot of  $\Delta fzIA$   $P_{xyf}$ - $fzIA$   $P_{van}$ - $mCherry$ - $fzIA$  mutant strain lysates depleted of WT FzIA and grown for 24 hours with vanillate and glucose. \*=degradation product. V = vanillate, G = glucose. The strain containing  $mCherry$ - $fzIA^{ST1}$  was severely sick and did not reach log phase in 24 hours. It was therefore not included in immunoblot analysis. Strain key:  $P_{van}$   $mChy$  FzIA,  $P_{xyf}$  FzIA (EG1310), FzIA<sup>NB1</sup> (EG1430), FzIA<sup>NB2</sup> (EG1438), FzIA<sup>NH2</sup> (EG1441), FzIA<sup>NH3</sup> (EG1442), FzIA<sup>UN1</sup> (EG1312), FzIA<sup>NH1</sup> (EG1311), FzIA<sup>WB1</sup> (EG1435), FzIA<sup>SOL3</sup> (EG1436), FzIA<sup>SOL4</sup> (EG1437), FzIA<sup>ST5</sup> (EG1451), FzIA<sup>UE2</sup> (EG1621), FzIA<sup>UE1</sup> (EG1313), FzIA<sup>SOL6</sup> (EG1453), FzIA<sup>ST6</sup> (EG1314), FzIA<sup>SOL5</sup> (EG1315), FzIA<sup>W1</sup> (EG1426), FzIA<sup>SOL1</sup> (EG1427), FzIA<sup>W2</sup> (EG1428), FzIA<sup>W3</sup> (EG1431), FzIA<sup>W4</sup> (EG1432), FzIA<sup>ST2</sup> (EG1433), FzIA<sup>SOL2</sup> (EG1434), FzIA<sup>W5</sup> (EG1439), FzIA<sup>W6</sup> (EG1440), FzIA<sup>W7</sup> (EG1443), FzIA<sup>W8</sup> (EG1444), FzIA<sup>ST4</sup> (EG1450), FzIA<sup>ST7</sup> (EG1452), FzIA<sup>ST3</sup> (EG1454), FzIA<sup>W9</sup> (EG1455), FzIA<sup>W10</sup> (EG1456), FzIA<sup>UN2</sup> (EG2302), FzIA<sup>W11</sup> (EG2304).

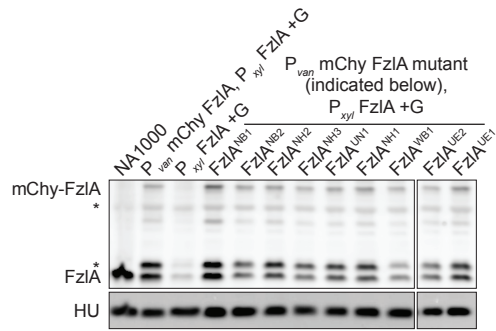

**Fig. S8. Protein levels of mCherry-FzlA under depletion conditions.**

$\alpha$ -FzlA (top) and  $\alpha$ -HU (bottom, loading control) immunoblot of  $\Delta fzlA$   $P_{xy1}$ - $fzIA$   $P_{van}$ - $mCherry$ - $fzIA$  mutant strain lysates depleted of WT FzlA and grown for 24 hours with glucose.

\*=degradation product. G = glucose. Only strains that were biochemically characterized are shown. Strain key: NA1000 (WT),  $P_{van}$  mChy FzlA,  $P_{xy1}$  FzlA (EG1310),  $P_{xy1}$  FzlA (EG312), FzlA<sup>NB1</sup> (EG1430), FzlA<sup>NB2</sup> (EG1438), FzlA<sup>NH2</sup> (EG1441), FzlA<sup>NH3</sup> (EG1442), FzlA<sup>UN1</sup> (EG1312), FzlA<sup>NH1</sup> (EG1311), FzlA<sup>WB1</sup> (EG1435), , FzlA<sup>UE2</sup> (EG1621), FzlA<sup>UE1</sup> (EG1313).

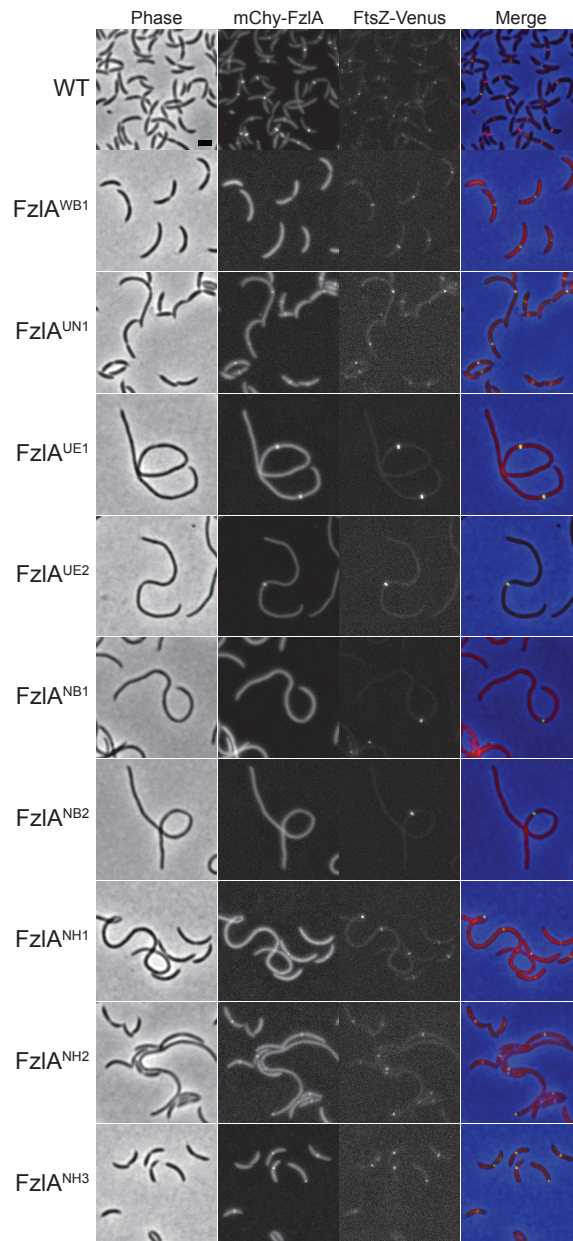

**Fig. S9. FtsZ forms rings in cells expressing *fzIA* mutant alleles**

Merged fluorescence microscopy images depicting mCherry-FzIA mutant protein (red) and FtsZ-Venus (green) localization in cells with  $\Delta fzIA$   $P_{xyl}$ -*fzIA*  $P_{van}$ -*mCherry-fzIA* mutant backgrounds that carry a low copy plasmid containing  $P_{lac}$ -FtsZ-Venus. Cells were depleted of WT FzIA and grown with vanillate for 24 hours prior to imaging. IPTG was not added as we found that leaky expression was sufficient for low levels of FtsZ-Venus expression. Yellow indicates co-localization of mCherry-FzIA and FtsZ-Venus. Scale bar = 2  $\mu$ m. Strain key: WT (EG1760), FzIA<sup>WB1</sup> (EG1762), FzIA<sup>UN1</sup> (EG1628), FzIA<sup>UE1</sup> (EG1767), FzIA<sup>UE2</sup> (EG1766), FzIA<sup>NB1</sup> (EG1761), FzIA<sup>NB2</sup> (EG1765), FzIA<sup>NH1</sup> (EG1770), FzIA<sup>NH2</sup> (EG1629), FzIA<sup>NH3</sup> (EG1768).

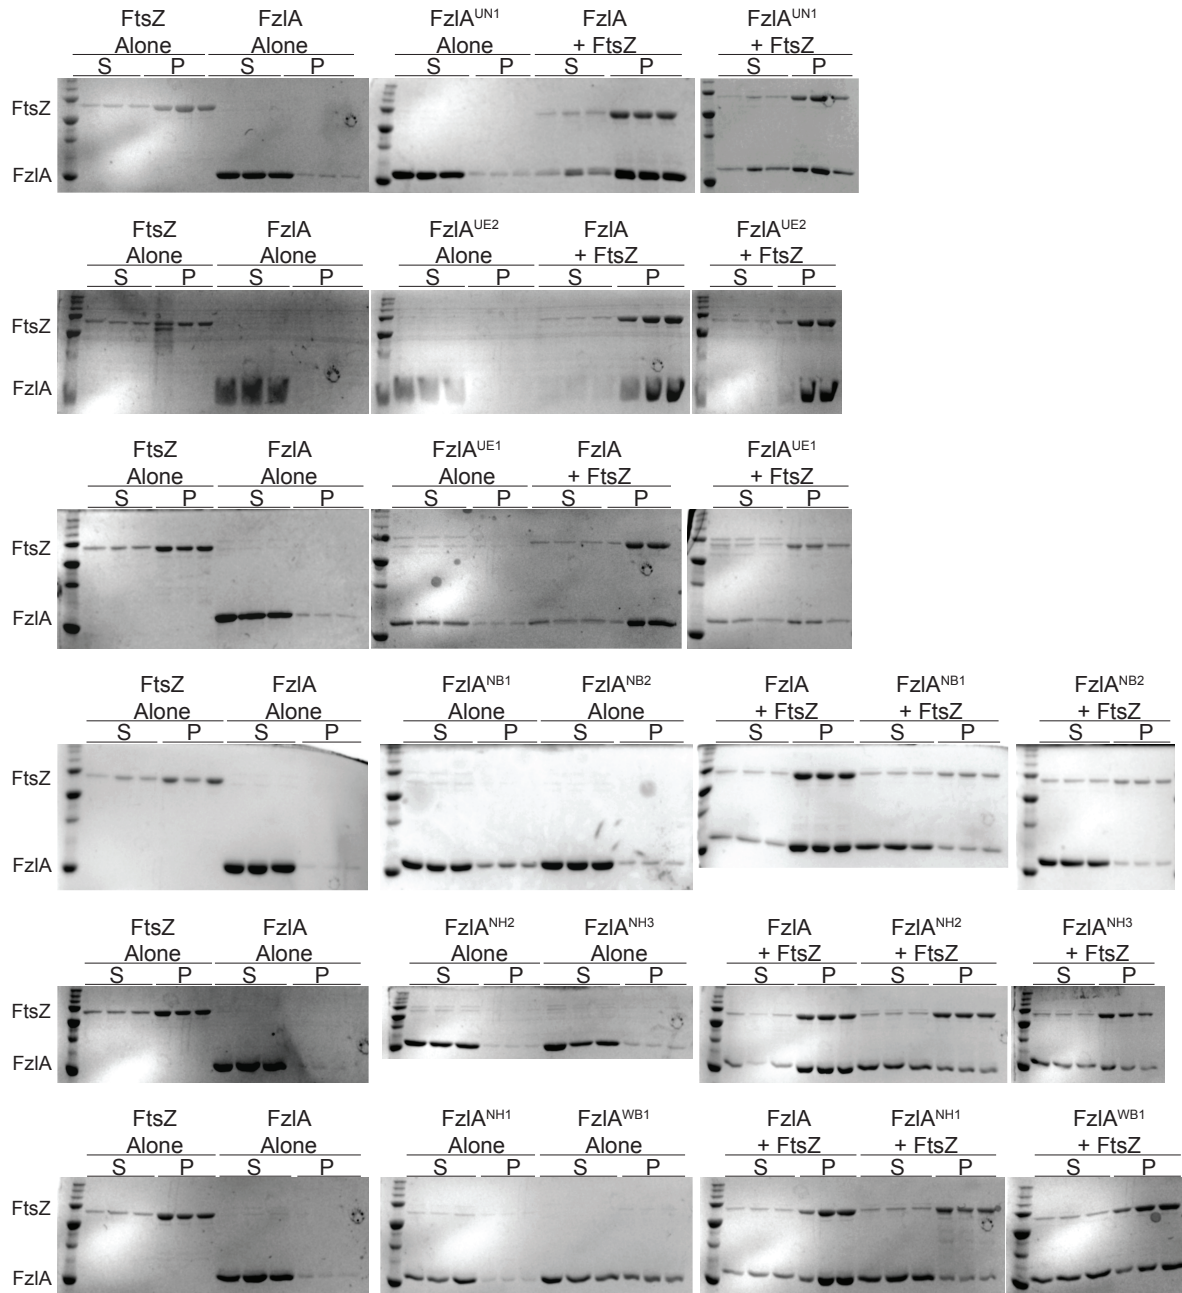

**Fig. S10. High speed co-pelleting of FzIA mutant proteins and FtsZ**

Coomassie-blue stained SDS-PAGE gels of FtsZ (2  $\mu$ M) and FzIA mutant proteins (4  $\mu$ M) that have been co-sedimented at high speed under polymerizing conditions, used for quantification (main text). S=supernatant, P=pellet. Experiments performed in triplicate, as shown. Each row shows samples run on the same day. Control experiments with FtsZ and WT FzIA were run each time for comparison to different FzIA mutants and to control for day-to-day variations.

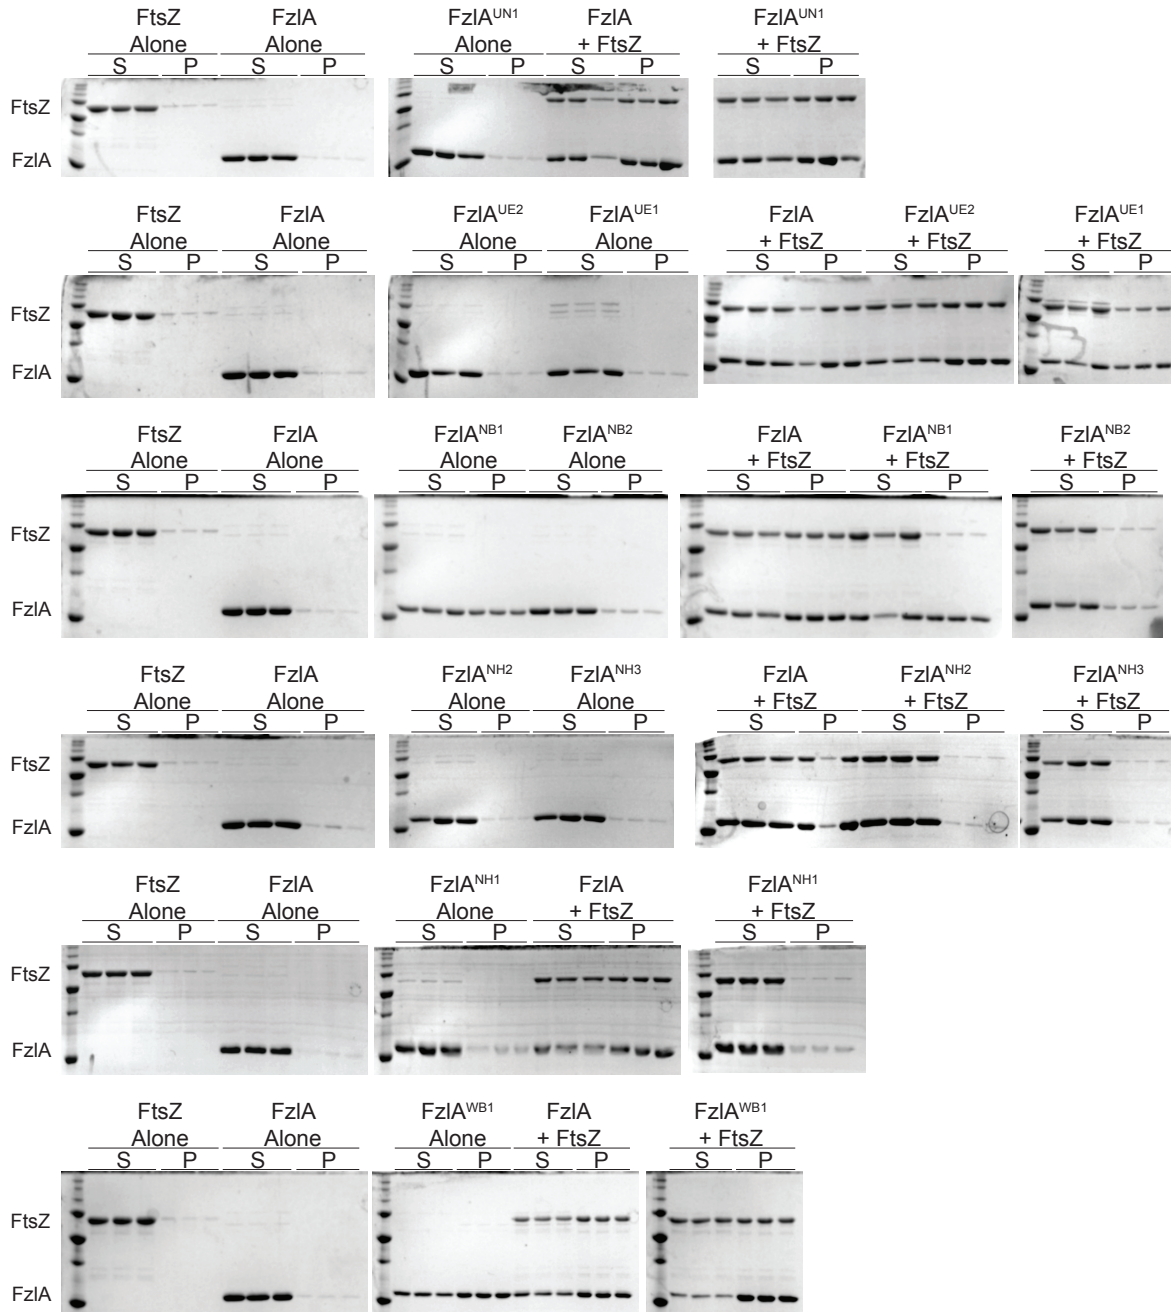

**Fig. S11. Low speed co-pelleting of FzIA mutant proteins and FtsZ**

Coomassie-blue stained SDS-PAGE gels of FtsZ (2  $\mu$ M) and FzIA mutant proteins (4  $\mu$ M) that have been co-sedimented at low speed under polymerizing conditions, used for quantification (main text). S=supernatant, P=pellet. Experiments performed in triplicate, as shown. Each row shows samples run on the same day. Control experiments with FtsZ and WT FzIA were run each time for comparison to different FzIA mutants and to control for day-to-day variations.



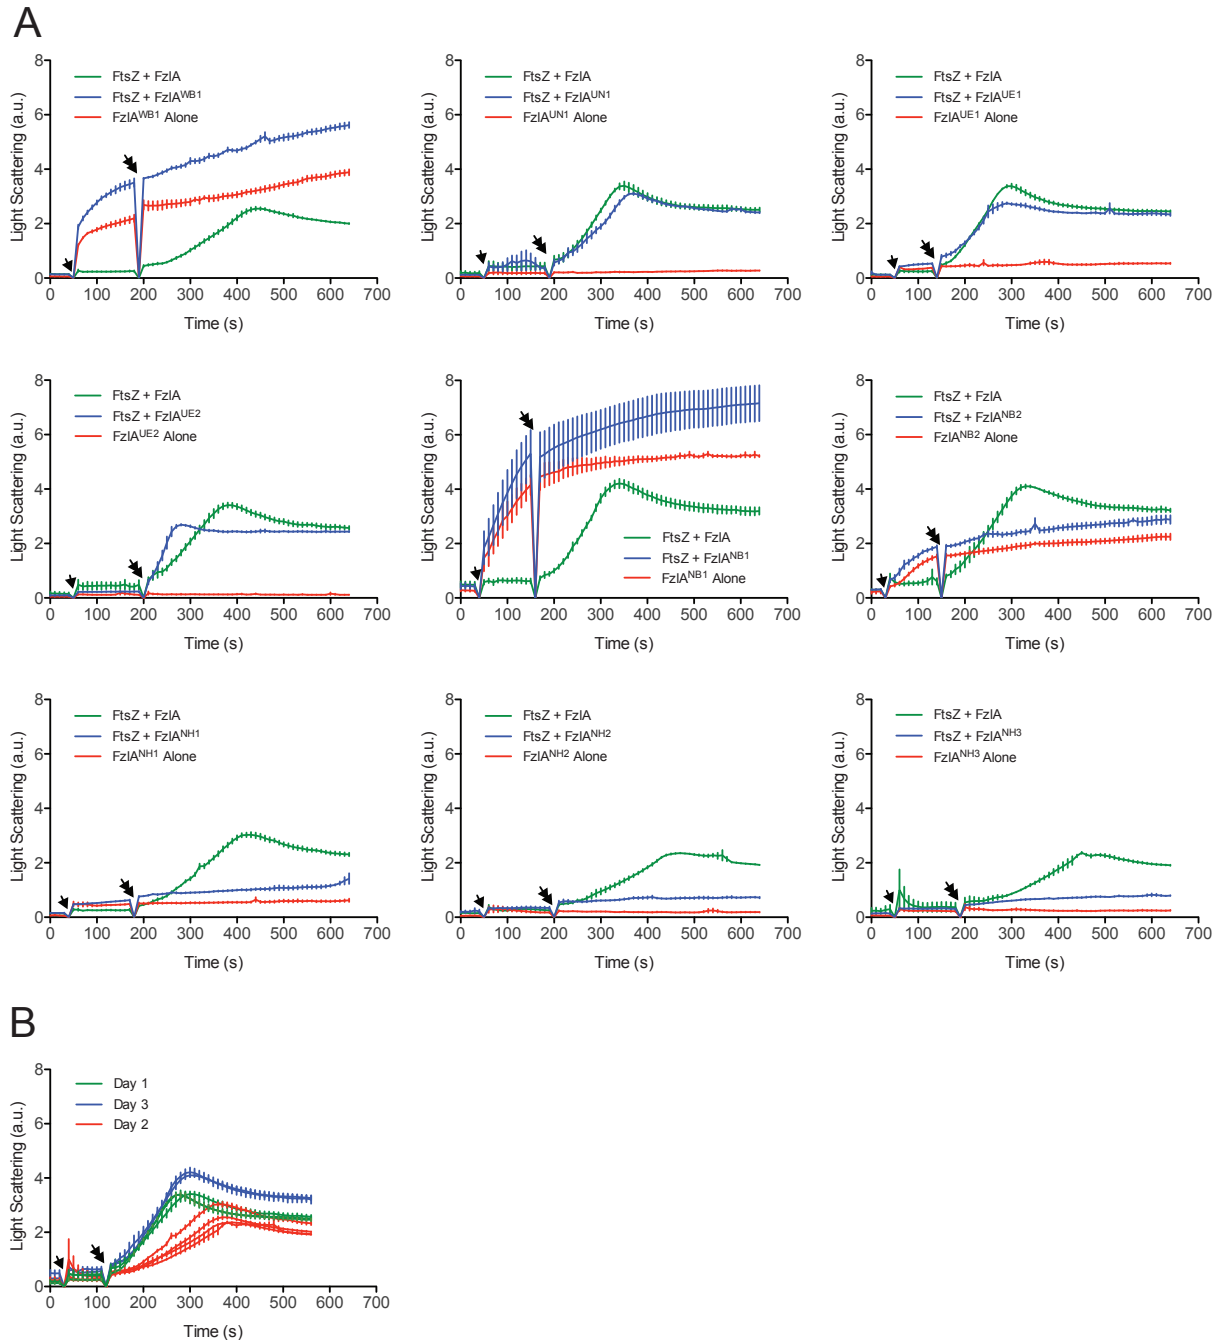

**Fig. S12. Some FzIA mutant proteins are able to form higher order structures in the presence of FtsZ.**

A. Plots of RALS over time for 4  $\mu$ M FzIA WT or mutant protein  $\pm$  2  $\mu$ M FtsZ. Mean  $\pm$  SEM is shown. Cuvettes containing FtsZ received injections of FzIA mutant protein (single arrow), then 2 mM GTP (double arrow) to induce polymerization. Experiments were performed in triplicate (except for FzIA<sup>UE1</sup> alone, which was done in duplicate). Some mutant proteins (WB1, NB1, NB2) displayed self-association on their own, as evidenced by an increase in signal without FtsZ (red lines). B. Plot of RALS over time for the FtsZ + FzIA control reaction for each experiment shown in panel A. Experiments were performed on three separate days, with the relevant mutant

proteins noted: Day 1 (FzlA<sup>UE1</sup>, FzlA<sup>UE2</sup>, FzlA<sup>UN1</sup>), Day 2 (FzlA<sup>WB1</sup>, FzlA<sup>Nh1</sup>, FzlA<sup>NH2</sup>, FzlA<sup>NH3</sup>), and Day 3 (FzlA<sup>NB1</sup>, FzlA<sup>NB2</sup>). FtsZ + FzlA displayed mild variability in terms of rate of light scattering and maximum intensity, but the characteristic shape of the curve remained relatively constant.

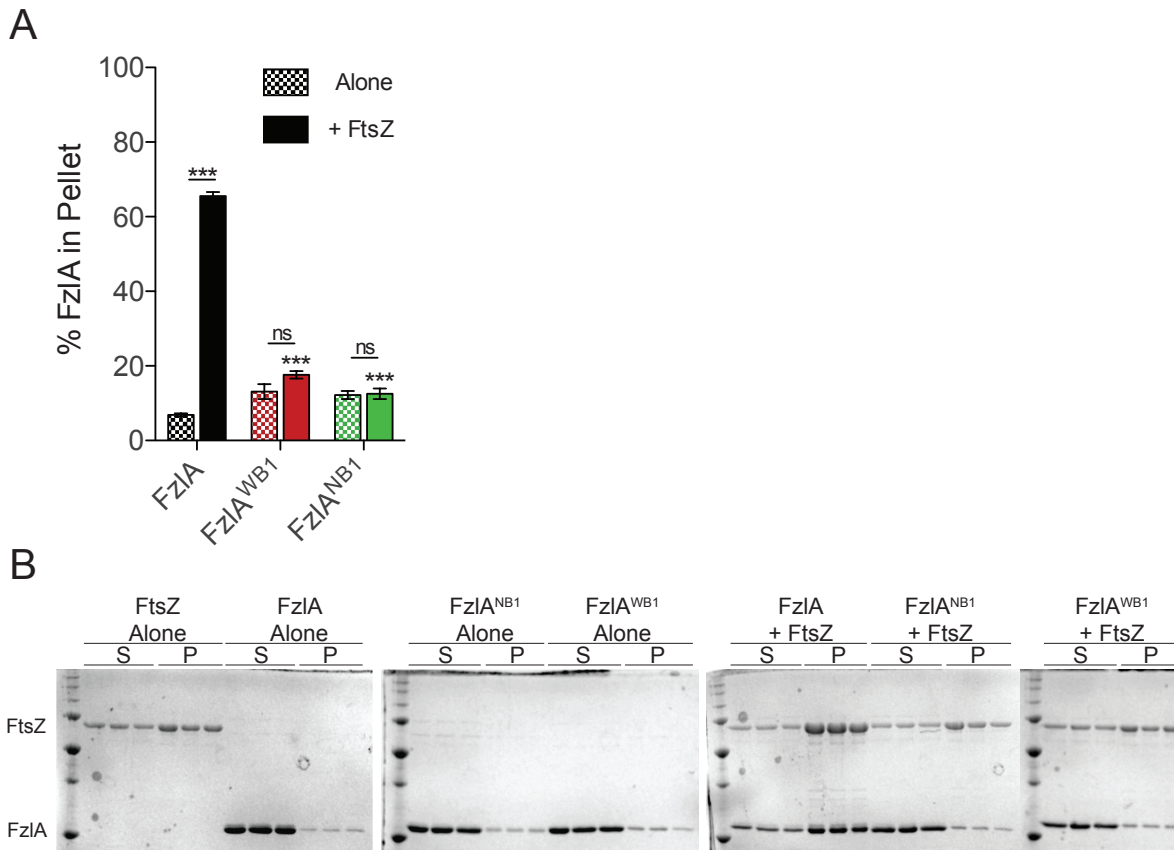

**Fig. S13. High speed co-pelleting of FzIA<sup>WB1</sup> or FzIA<sup>NB1</sup> and FtsZ**

A, B. Quantification of percent FzIA found in pellet (A) and Coomassie-blue stained SDS-PAGE gels (B) of FtsZ (4  $\mu$ M) and FzIA mutant protein (4  $\mu$ M) that have been co-sedimented at high speed in HEK50 polymerization buffer (50 mM HEPES, 50 mM KCl, pH 7.2; 2 mM GTP; 10 mM MgCl<sub>2</sub>). For (A), a one way ANOVA with Dunnett's multiple comparison test was performed to assess differences between each FzIA mutant protein + FtsZ and WT FzIA + FtsZ (lower asterisks). Unpaired t-tests were performed to analyze the difference between a given FzIA mutant protein alone vs. with FtsZ. For all statistical tests, <sup>ns</sup>P>0.05, <sup>\*\*\*</sup>P $\le$ 0.001 and n=3 for each sample. For (B), S=supernatant, P=pellet.

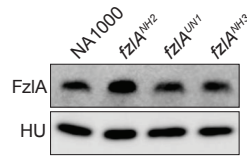

**Fig. S14. Protein levels of FzIA in *fzIA* allelic exchange strains.**

$\alpha$ -FzIA (top) and  $\alpha$ -HU (bottom) immunoblots of *fzIA* allelic exchange strain lysates. Strain key: NA1000 (WT), *fzIA*<sup>NH2</sup> (EG1600), *fzIA*<sup>UNI</sup> (EG1671), *fzIA*<sup>NH3</sup> (EG1909).

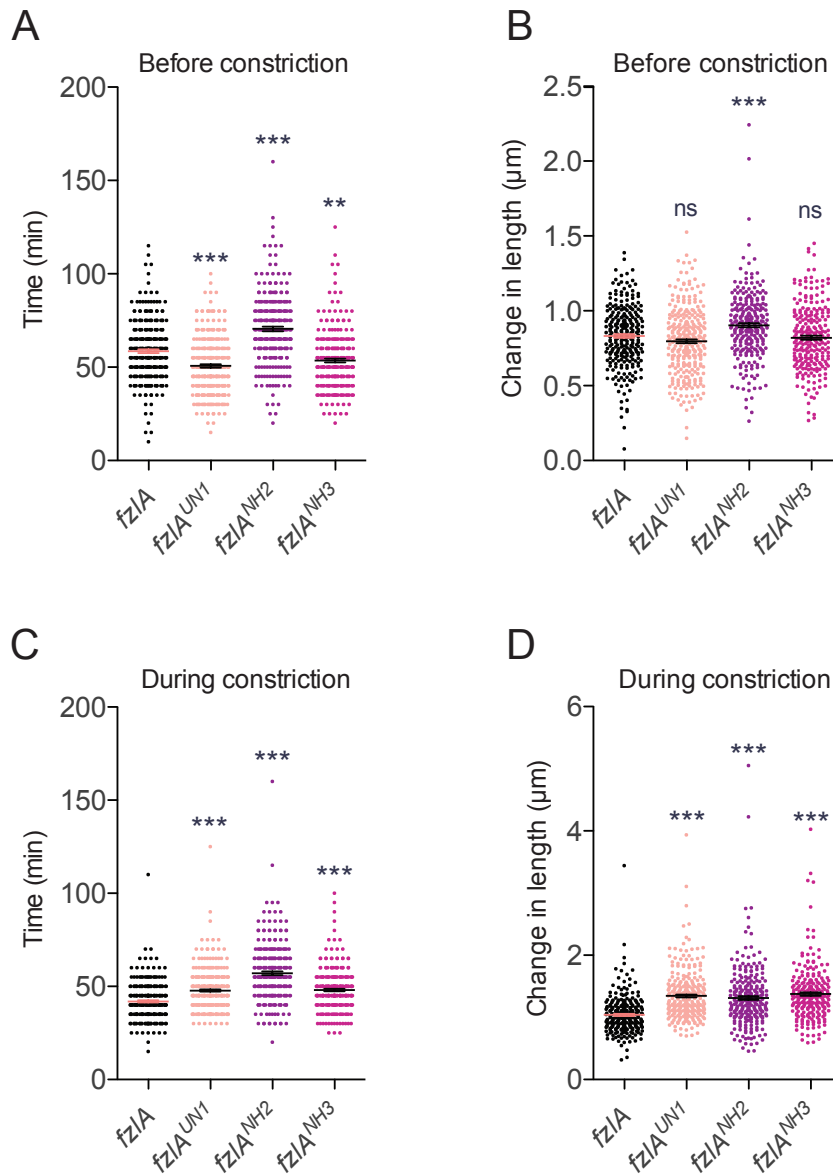

**Fig. S15. Pre-constriction time and change in cell length for *fzIA* allelic exchange strains.**

A-D. Plots of pre-constriction time (A), change in cell length before constriction (B), constriction time (C) and change in cell length during constriction (D) for a population of synchronized cells from each *fzIA* strain, calculated from single cell microscopy data. Pre-constriction time was calculated by determining the number of frames from initial image acquisition until cells began to divide, then converting to minutes. Constriction time was calculated by counting the number of frames from constriction initiation until cell separation, then converting into minutes. Mean  $\pm$  SEM is shown. A one way ANOVA with Tukey's multiple comparison test was performed to analyze differences compared to WT: ns  $P > 0.05$ , \*  $P \leq 0.01$ , \*\*\*  $P \leq 0.001$ . From left to right,  $n = 271, 295, 260, 249$  (A, B, C) and  $266, 293, 258, 246$  (D). Strain key: *fzIA* (NA1000), *fzIA<sup>UN1</sup>* (EG1908), *fzIA<sup>NH2</sup>* (EG1600), *fzIA<sup>NH3</sup>* (EG1909).

**Videos 1-4. Timelapse movies of constricting *C. crescentus* cells.**

Synchronized WT (1), *fzLA*<sup>UN1</sup> (2), *fzLA*<sup>NH2</sup> (3), or *fzLA*<sup>NH3</sup> (4) cells grown on PYE and imaged every 5 minutes. Videos are shown at 8 fps (2400x speed).

## Supplemental References

- Aakre, C.D., Phung, T.N., Huang, D., and Laub, M.T. (2013) A Bacterial Toxin Inhibits DNA Replication Elongation Through a Direct Interaction with the  $\beta$  Sliding Clamp. *Mol Cell* **52**: 617–628.
- Abel, S., Bucher, T., Nicollier, M., Hug, I., Kaefer, V., Abel Zur Wiesch, P., and Jenal, U. (2013) Bi-modal distribution of the second messenger c-di-GMP controls cell fate and asymmetry during the caulobacter cell cycle. *PLoS Genet* **9**: e1003744.
- Bendezú, F.O., Hale, C.A., Bernhardt, T.G., and Boer, P.A.J. de (2009) RodZ (YfgA) is required for proper assembly of the MreB actin cytoskeleton and cell shape in *E. coli*. *EMBO J* **28**: 193–204.
- Evinger, M., and Agabian, N. (1977) Envelope-associated nucleoid from *Caulobacter crescentus* stalked and swarmer cells. *J Bacteriol* **132**: 294–301.
- Goley, E.D., Dye, N.A., Werner, J.N., Gitai, Z., and Shapiro, L. (2010) Imaging-based identification of a critical regulator of FtsZ protofilament curvature in *Caulobacter*. *Mol Cell* **39**: 975–987.
- Goley, E.D., Yeh, Y.-C., Hong, S.-H., Fero, M.J., Abeliuk, E., McAdams, H.H., and Shapiro, L. (2011) Assembly of the *Caulobacter* cell division machine. *Mol Microbiol* **80**: 1680–1698.
- Roberts, R.C., Toochinda, C., Avedissian, M., Baldini, R.L., Gomes, S.L., and Shapiro, L. (1996) Identification of a *Caulobacter crescentus* operon encoding *hrcA*, involved in negatively regulating heat-inducible transcription, and the chaperone gene *grpE*. *J Bacteriol* **178**: 1829–1841.
- Sundararajan, K., Miguel, A., Desmarais, S.M., Meier, E.L., Huang, K.C., and Goley, E.D. (2015) The bacterial tubulin FtsZ requires its intrinsically disordered linker to direct robust cell wall construction. *Nat Commun* **6**: 7281.
- Thanbichler, M., Iniesta, A.A., and Shapiro, L. (2007) A comprehensive set of plasmids for vanillate- and xylose-inducible gene expression in *Caulobacter crescentus*. *Nucleic Acids Res* **35**: e137.
- Thanbichler, M., and Shapiro, L. (2006) MipZ, a Spatial Regulator Coordinating Chromosome Segregation with Cell Division in *Caulobacter*. *Cell* **126**: 147–162.
